# Supplementary material for: Comparative efficacy of traditional non-selective NSAIDs and selective cyclo-oxygenase-2 inhibitors in patients with acute gout: a systematic review and meta-analysis
Source: PubMed Central journal article supplement — BMJ Open. 2020 Sep 10;10(9):e036748. doi: 10.1136/bmjopen-2019-036748 (PMC7485255; doi:10.1136/bmjopen-2019-036748), 2020-09-10
Supplement: bmjopen-2019-036748supp001.pdf [file bmjopen-2019-036748supp001.pdf]

**Supplementary Material for:** “Comparative efficacy of traditional non-selective NSAIDs and selective cyclooxygenase-2 inhibitor in patients with acute gout: a systematic review and meta-analysis”

**Journal:** BMJ Open

**Authors:** Mengtao Li, PhD, Chen Yu, PhD, Xiaofeng Zeng, PhD

**Corresponding author:** Prof Xiaofeng Zeng, Department of Rheumatology and Clinical Immunology, Peking Union Medical College Hospital, Chinese Academy of Medical Sciences & Peking Union Medical College, Beijing, China

**Table of content**

**Figure S1.** Risk of bias summary

**Figure S2.** Risk of bias graph

**Table S1.** Detailed search strategy

**Table S2.** Summary of findings: COXIBs vs traditional NSAIDs for acute gout

**Table S3.** Summary of findings: one COXIB vs another COXIB for acute gout

|                   | Random sequence generation (selection bias) | Allocation concealment (selection bias) | Blinding of participants and personnel (performance bias) | Blinding of outcome assessment (detection bias) | Incomplete outcome data (attrition bias) | Selective reporting (reporting bias) | Other bias |
|-------------------|---------------------------------------------|-----------------------------------------|-----------------------------------------------------------|-------------------------------------------------|------------------------------------------|--------------------------------------|------------|
| Cui M 2016        | +                                           | ?                                       | ?                                                         | ?                                               | +                                        | ?                                    | +          |
| Gao C 2018        | +                                           | ?                                       | ?                                                         | ?                                               | +                                        | ?                                    | +          |
| Gao Q 2013        | +                                           | ?                                       | ?                                                         | ?                                               | +                                        | ?                                    | +          |
| Guo D 2014        | +                                           | ?                                       | ?                                                         | ?                                               | +                                        | ?                                    | +          |
| Guo M 2014        | +                                           | ?                                       | ?                                                         | ?                                               | +                                        | ?                                    | +          |
| Hong J 2013       | +                                           | ?                                       | ?                                                         | ?                                               | +                                        | ?                                    | +          |
| Kuang L 2015      | +                                           | ?                                       | ?                                                         | ?                                               | +                                        | ?                                    | +          |
| Lan T 2018        | +                                           | ?                                       | ?                                                         | ?                                               | +                                        | ?                                    | +          |
| Li S 2016         | +                                           | ?                                       | ?                                                         | ?                                               | +                                        | ?                                    | +          |
| Li T 2013         | +                                           | +                                       | +                                                         | +                                               | +                                        | +                                    | +          |
| Liu C 2015        | +                                           | ?                                       | ?                                                         | ?                                               | +                                        | ?                                    | +          |
| Li Y 2017         | -                                           | ?                                       | ?                                                         | ?                                               | +                                        | ?                                    | +          |
| Lu J 2014         | +                                           | ?                                       | ?                                                         | ?                                               | +                                        | ?                                    | +          |
| Ming H 2016       | +                                           | ?                                       | ?                                                         | ?                                               | +                                        | ?                                    | +          |
| Pan Q 2016        | +                                           | ?                                       | ?                                                         | ?                                               | +                                        | ?                                    | +          |
| Rubin B 2004      | +                                           | +                                       | +                                                         | +                                               | +                                        | +                                    | +          |
| Schumacher H 2002 | +                                           | +                                       | +                                                         | +                                               | +                                        | +                                    | +          |
| Sheng J 2019      | +                                           | ?                                       | ?                                                         | ?                                               | +                                        | ?                                    | +          |
| Wu L 2019         | +                                           | ?                                       | ?                                                         | ?                                               | +                                        | ?                                    | +          |
| Xia H 2015        | +                                           | ?                                       | ?                                                         | ?                                               | +                                        | ?                                    | +          |
| Ye Q 2010         | +                                           | ?                                       | ?                                                         | ?                                               | +                                        | ?                                    | +          |
| Zhang J 2012      | +                                           | ?                                       | ?                                                         | ?                                               | +                                        | ?                                    | +          |
| Zhou S 2016       | +                                           | ?                                       | ?                                                         | ?                                               | +                                        | ?                                    | +          |
| Zhu H 2015        | +                                           | ?                                       | ?                                                         | ?                                               | +                                        | ?                                    | +          |

Figure S1. Risk of bias summary

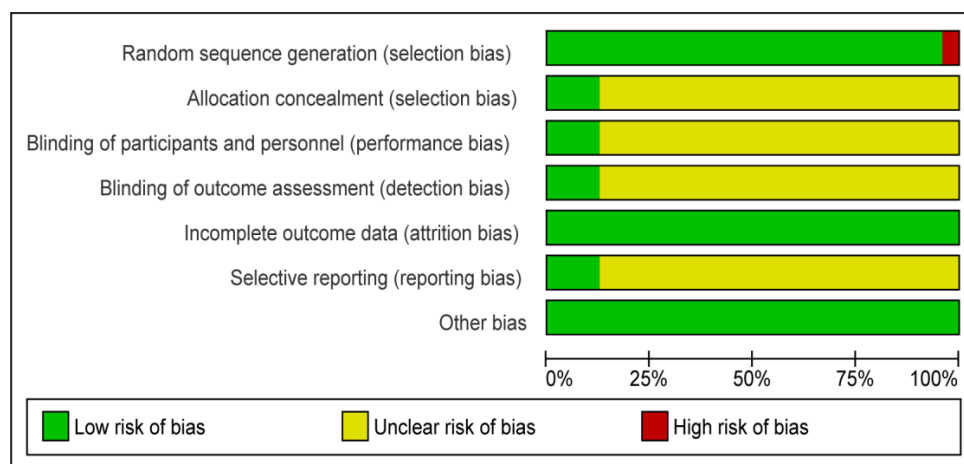

**Figure S2.** Risk of bias graph

**Table S1.** Detailed search strategy

| <b>PubMed</b>         |                                                                                                                                                                                        |        |
|-----------------------|----------------------------------------------------------------------------------------------------------------------------------------------------------------------------------------|--------|
| Search                | Query                                                                                                                                                                                  | Number |
| #3                    | Search (((gout) OR gouty arthritis) OR acute gout) AND (((Etoricoxib) OR Celecoxib) OR Meloxicam)                                                                                      | 61     |
| #2                    | Search ((gout) OR gouty arthritis) OR acute gout                                                                                                                                       | 18847  |
| #1                    | Search ((Etoricoxib) OR Celecoxib) OR Meloxicam                                                                                                                                        | 9404   |
| <b>Web of Science</b> |                                                                                                                                                                                        |        |
| # 3                   | #2 AND #1<br>Databases = WOS, BIOSIS, CSCD, DIIDW, INSPEC, KJD, MEDLINE, RSCI, SCIELO. Timespan=All years; Search language=Auto                                                        | 183    |
| # 2                   | TOPIC: (gout) OR TOPIC: (gouty arthritis) OR TOPIC: (acute gout)<br>Databases = WOS, BIOSIS, CSCD, DIIDW, INSPEC, KJD, MEDLINE, RSCI, SCIELO. Timespan=All years; Search language=Auto | 36,548 |
| # 1                   | TOPIC: (Etoricoxib) OR TOPIC: (Celecoxib) OR TOPIC: (Meloxicam)<br>Databases = WOS, BIOSIS, CSCD, DIIDW, INSPEC, KJD, MEDLINE, RSCI, SCIELO. Timespan=All years; Search language=Auto  | 19,277 |
| <b>Embase</b>         |                                                                                                                                                                                        |        |
| # 3                   | #2 AND #3                                                                                                                                                                              | 308    |
| # 2                   | 'gout'/exp OR gout OR 'gouty arthritis'/exp OR 'gouty arthritis' OR (gouty AND ('arthritis'/exp OR arthritis)) OR 'acute gout'/exp OR 'acute gout' OR (acute AND ('gout'/exp OR gout)) | 28,967 |
| # 1                   | 'etoricoxib'/exp OR etoricoxib OR 'celecoxib'/exp OR celecoxib OR 'meloxicam'/exp OR meloxicam                                                                                         | 29,285 |
| <b>CNKI</b>           |                                                                                                                                                                                        |        |
|                       | (依托考昔 and 痛风) OR (塞来昔布 and 痛风) OR (美洛昔康 and 痛风)                                                                                                                                        | 214    |
|                       | (Etoricoxib and Gout) OR (Celecoxib and Gout) OR (Meloxicam and Gout)                                                                                                                  | 214    |
| <b>Wangfang</b>       |                                                                                                                                                                                        |        |
|                       | 主题:(痛风)*主题:(美洛昔康) Etoricoxib and Gout                                                                                                                                                  | 97     |
|                       | 主题:(痛风)*主题:(塞来昔布) Celecoxib and Gout                                                                                                                                                   | 121    |
|                       | 主题:(痛风)*主题:(依托考昔) Meloxicam and Gout                                                                                                                                                   | 107    |
|                       | (依托考昔 and 痛风) OR (塞来昔布 and 痛风) OR (美洛昔康 and 痛风)                                                                                                                                        | 325    |
|                       | (Etoricoxib and Gout) OR (Celecoxib and Gout) OR (Meloxicam and Gout)                                                                                                                  | 325    |

**Table S2: Summary of findings: COXIBs vs traditional NSAIDs for acute gout****COXIBs compared to traditional NSAIDs for acute gout****Patient or population:** acute gout**Setting:****Intervention:** COXIBs**Comparison:** traditional NSAIDs

| Outcomes                                                           | N <sup>o</sup> of participants (studies) Follow-up | Certainty of the evidence (GRADE) | Relative effect (95% CI) | Anticipated absolute effects |                                                         |
|--------------------------------------------------------------------|----------------------------------------------------|-----------------------------------|--------------------------|------------------------------|---------------------------------------------------------|
|                                                                    |                                                    |                                   |                          | Risk with traditional NSAIDs | Risk difference with COXIBs                             |
| Pain Likert scale                                                  | 593 (4 RCTs)                                       | ⊕⊕⊕⊕<br>HIGH                      | -                        | -                            | SMD <b>0.15 SD lower</b><br>(0.31 lower to 0.01 higher) |
| Pain Likert scale - Etoricoxib 120 mg qd vs Indomethacin 50 mg tid | 513 (3 RCTs)                                       | ⊕⊕⊕⊕<br>HIGH                      | -                        | -                            | SMD <b>0.09 lower</b><br>(0.27 lower to 0.08 higher)    |
| Pain Likert scale - Etoricoxib 120 mg qd vs Diclofenac 75 mg qd    | 80 (1 RCT)                                         | ⊕⊕⊕⊕<br>HIGH                      | -                        | -                            | SMD <b>0.53 lower</b><br>(0.98 lower to 0.09 lower)     |
| Pain VAS scale                                                     | 741 (6 RCTs)                                       | ⊕⊕⊕⊕<br>HIGH                      | -                        | -                            | SMD <b>1.95 SD lower</b><br>(3.46 lower to 0.044 lower) |
| Pain VAS scale - Etoricoxib 120 mg qd vs Diclofenac 75 mg bid      | 426 (2 RCTs)                                       | ⊕⊕⊕⊕<br>HIGH                      | -                        | -                            | SMD <b>1.63 SD lower</b><br>(460 lower to 1.34 higher)  |

**COXIBs compared to traditional NSAIDs for acute gout****Patient or population:** acute gout**Setting:****Intervention:** COXIBs**Comparison:** traditional NSAIDs

| Outcomes                                                                         | No of participants (studies) Follow-up | Certainty of the evidence (GRADE) | Relative effect (95% CI)          | Anticipated absolute effects |                                                         |
|----------------------------------------------------------------------------------|----------------------------------------|-----------------------------------|-----------------------------------|------------------------------|---------------------------------------------------------|
|                                                                                  |                                        |                                   |                                   | Risk with traditional NSAIDs | Risk difference with COXIBs                             |
| Pain VAS scale - Etoricoxib 120 mg qd vs Diclofenac 75 mg qd                     | 155<br>(2 RCTs)                        | ⊕⊕⊕⊕<br>HIGH                      | -                                 | -                            | SMD <b>1.82 SD lower</b><br>(5.18 lower to 1.53 higher) |
| Pain VAS scale - Celecoxib 200 mg qd vs Diclofenac 100 mg qd                     | 160<br>(2 RCTs)                        | ⊕⊕⊕⊕<br>HIGH                      | -                                 | -                            | SMD <b>2.41 lower</b><br>(5.91 lower to 1.09 higher)    |
| Response rate                                                                    | 382<br>(3 RCTs)                        | ⊕⊕⊕⊕<br>HIGH                      | <b>OR 6.71</b><br>(2.88 to 15.64) | 805 per 1,000                | <b>160 more per 1,000</b><br>(118 more to 180 more)     |
| C-reactive protein                                                               | 674<br>(5 RCTs)                        | ⊕⊕⊕⊕<br>HIGH                      | -                                 | -                            | SMD <b>0.88 SD lower</b><br>(1.63 lower to 0.12 lower)  |
| C-reactive protein-Pain VAS scale - Etoricoxib 120 mg qd vs Diclofenac 75 mg bid | 426<br>(2 RCTs)                        | ⊕⊕⊕⊕<br>HIGH                      | -                                 | -                            | SMD <b>1.15 SD lower</b><br>(3.09 lower to 0.79 higher) |

**COXIBs compared to traditional NSAIDs for acute gout****Patient or population:** acute gout**Setting:****Intervention:** COXIBs**Comparison:** traditional NSAIDs

| Outcomes                                                                        | No of participants (studies) Follow-up | Certainty of the evidence (GRADE) | Relative effect (95% CI) | Anticipated absolute effects |                                                        |
|---------------------------------------------------------------------------------|----------------------------------------|-----------------------------------|--------------------------|------------------------------|--------------------------------------------------------|
|                                                                                 |                                        |                                   |                          | Risk with traditional NSAIDs | Risk difference with COXIBs                            |
| C-reactive protein-Pain VAS scale - Etoricoxib 120 mg qd vs Diclofenac 75 mg qd | 249 (3 RCTs)                           | ⊕⊕⊕⊕<br>HIGH                      | -                        | -                            | SMD <b>0.69 SD lower</b><br>(1.35 lower to 0.04 lower) |
| Patient's global assessment of response                                         | 511 (3 RCTs)                           | ⊕⊕⊕⊕<br>HIGH                      | -                        | -                            | SMD <b>0.1 SD lower</b><br>(0.27 lower to 0.07 higher) |
| Investigator's global assessment of response                                    | 509 (3 RCTs)                           | ⊕⊕⊕⊕<br>HIGH                      | -                        | -                            | SMD <b>0.29 SD lower</b><br>(0.46 lower to 0.11 lower) |
| Inflammation swelling                                                           | 321 (2 RCTs)                           | ⊕⊕⊕⊕<br>HIGH                      | -                        | -                            | SMD <b>0.25 lower</b><br>(0.74 lower to 0.24 higher)   |
| Onset of efficacy (h) - Etoricoxib 120 mg qd vs Diclofenac 75 mg qd             | 113 (1 RCT)                            | ⊕⊕⊕⊕<br>HIGH                      | -                        | -                            | SMD <b>0.94 lower</b><br>(1.33 lower to 0.55 lower)    |

---

**COXIBs compared to traditional NSAIDs for acute gout**


---

**Patient or population:** acute gout

**Setting:**

**Intervention:** COXIBs

**Comparison:** traditional NSAIDs

| Outcomes | No of participants (studies) Follow-up | Certainty of the evidence (GRADE) | Relative effect (95% CI) | Anticipated absolute effects |                             |
|----------|----------------------------------------|-----------------------------------|--------------------------|------------------------------|-----------------------------|
|          |                                        |                                   |                          | Risk with traditional NSAIDs | Risk difference with COXIBs |

\***The risk in the intervention group** (and the associated 95% confidence interval) is based on the assumed risk in the comparison group and the **relative effect** of the intervention (and the associated 95% CI).

**CI:** Confidence interval; **SMD:** Standardized mean difference; **OR:** Odds ratio

---

**GRADE Working Group grades of evidence**

**High certainty:** We are very confident that the true effect lies close to that of the estimate of the effect

**Moderate certainty:** We are moderately confident in the effect estimate: The true effect is likely to be close to the estimate of the effect, but there is a possibility that it is substantially different

**Low certainty:** Our confidence in the effect estimate is limited: The true effect may be substantially different from the estimate of the effect

**Very low certainty:** We have very little confidence in the effect estimate: The true effect is likely to be substantially different from the estimate of effect

---



**Table S3: Summary of findings: one COXIB vs another COXIB for acute gout****Another COXIBs compared to one COXIBs for acute gout****Patient or population:** acute gout**Setting:****Intervention:** another COXIBs**Comparison:** one COXIBs

| Outcomes                                                      | No of participants (studies) Follow-up | Certainty of the evidence (GRADE) | Relative effect (95% CI)          | Anticipated absolute effects |                                                          |
|---------------------------------------------------------------|----------------------------------------|-----------------------------------|-----------------------------------|------------------------------|----------------------------------------------------------|
|                                                               |                                        |                                   |                                   | Risk with one COXIBs         | Risk difference with another COXIBs                      |
| Pain Likert scale                                             | 292 (3 RCTs)                           | ⊕⊕⊕⊕<br>HIGH                      | -                                 | -                            | SMD <b>0.56 lower</b><br>(1.1 lower to 0.02 lower)       |
| Pain VAS scale                                                | 436 (6 RCTs)                           | ⊕⊕⊕⊕<br>HIGH                      | -                                 | -                            | SMD <b>2.82 SD lower</b><br>(4.01 lower to 1.62 lower)   |
| Pain VAS scale - Etoricoxib 120 mg qd vs Celecoxib 200 mg tid | 312 (4 RCTs)                           | ⊕⊕⊕⊕<br>HIGH                      | -                                 | -                            | SMD <b>2.36 lower</b><br>(3.36 lower to 1.37 lower)      |
| Pain VAS scale - Etoricoxib 120 mg qd vs Meloxicam 15 mg qd   | 124 (2 RCTs)                           | ⊕⊕⊕⊕<br>HIGH                      | -                                 | -                            | SMD <b>4.02 SD lower</b><br>(10.28 lower to 2.24 higher) |
| Response rate-Etoricoxib 120 mg qd vs Celecoxib 200 mg bid    | 216 (3 RCTs)                           | ⊕⊕⊕⊕<br>HIGH                      | <b>OR 4.84</b><br>(2.19 to 10.72) | 694 per 1,000                | <b>222 more per 1,000</b><br>(138 more to 266 more)      |

---

**Another COXIBs compared to one COXIBs for acute gout**


---

**Patient or population:** acute gout

**Setting:**
**Intervention:** another COXIBs

**Comparison:** one COXIBs

| Outcomes                                                         | No of participants (studies) Follow-up | Certainty of the evidence (GRADE) | Relative effect (95% CI) | Anticipated absolute effects |                                                        |
|------------------------------------------------------------------|----------------------------------------|-----------------------------------|--------------------------|------------------------------|--------------------------------------------------------|
|                                                                  |                                        |                                   |                          | Risk with one COXIBs         | Risk difference with another COXIBs                    |
| C-reactive protein                                               | 140 (2 RCTs)                           | ⊕⊕⊕⊕<br>HIGH                      | -                        | -                            | SMD <b>1.98 SD lower</b><br>(4.9 lower to 0.95 higher) |
| Onset of efficacy (h)-Etoricoxib 120 mg qd vs Meloxicam 15 mg qd | 84 (1 RCT)                             | ⊕⊕⊕⊕<br>HIGH                      | -                        | -                            | SMD <b>1.57 lower</b><br>(2.07 lower to 1.08 lower)    |

\***The risk in the intervention group** (and the associated 95% confidence interval) is based on the assumed risk in the comparison group and the **relative effect** of the intervention (and the associated 95% CI).

**CI:** Confidence interval; **SMD:** Standardized mean difference; **OR:** Odds ratio

---

**GRADE Working Group grades of evidence**

**High certainty:** We are very confident that the true effect lies close to that of the estimate of the effect

**Moderate certainty:** We are moderately confident in the effect estimate: The true effect is likely to be close to the estimate of the effect, but there is a possibility that it is substantially different

**Low certainty:** Our confidence in the effect estimate is limited: The true effect may be substantially different from the estimate of the effect

**Very low certainty:** We have very little confidence in the effect estimate: The true effect is likely to be substantially different from the estimate of effect

---
